# Supplementary material for: Formation and Expansion of Memory B Cells against Coronavirus in Acutely Infected COVID-19 Individuals
Source: MDPI journal article supplement (doi:10.3390/pathogens11020186), 2022-01-29
Supplement: s1 [file s1]

**Table S1: Acute Infection Cohort**

| Participant ID | Birth Yr. | Age (Yr.) | Sex |
|----------------|-----------|-----------|-----|
| ACU141         | 1995      | 25        | M   |
| ACU142         | 1966      | 53        | F   |
| ACU143         | 1966      | 54        | M   |
| ACU144         | 1990      | 29        | F   |
| ACU146         | 1966      | 53        | F   |
| ACU150         | 1972      | 47        | F   |
| ACU151         | 1979      | 40        | M   |
| ACU153         | 2000      | 20        | F   |

All participants were PCR-positive for SARS-CoV-2 infection and presented with mild symptoms. All participants were enrolled in May 2020. "Age (Yr.)" column indicates age at enrolment.

**Table S2: Coronavirus Multiplex Antigen Panel**

| Protein | Group         | Virus                         |
|---------|---------------|-------------------------------|
| S       | $\beta$ -CoV  | SARS-CoV-2                    |
|         |               | SARS-CoV (2003)               |
|         |               | HCoV-OC43                     |
|         |               | HCoV-HKU1                     |
|         | $\alpha$ -CoV | HCoV-229E                     |
|         |               | HCoV-NL63                     |
| N       | $\beta$ -CoV  | SARS-CoV-2                    |
|         |               | SARS-CoV (2003)               |
|         |               | HCoV-OC43                     |
|         |               | HCoV-HKU1                     |
|         | $\alpha$ -CoV | HCoV-229E                     |
|         |               | HCoV-NL63                     |
| RBD*    | $\beta$ -CoV  | SARS-CoV-2 (cat. #40592-V08H) |
| S1*     |               | SARS-CoV-2 (cat. #40591-V08H) |
| S2*     |               | SARS-CoV-2 (cat. #40590-V08H) |

\*Reagents purchased from SinoBiological.

Other reagents were expressed in-house using baculovirus expression system (Wang et al. 2021, Front. Immunol.).

**Table S3: Severely Infected Cohort**

| <b>Participant ID</b> | <b>Age (Yr.)</b> | <b>Sex</b> |
|-----------------------|------------------|------------|
| HD2187                | 76               | M          |
| HD2188                | 83               | M          |
| HD2189                | 20               | F          |
| HD2190                | 47               | M          |
| HD2191                | 81               | F          |
| HD2192                | 58               | M          |
| HD2193                | 73               | F          |
| HD2194                | 77               | M          |
| HD2195                | 82               | F          |
| HD2196                | 56               | F          |
| HD2197                | 67               | F          |
| HD2198                | 59               | M          |

All participants were PCR-positive for SARS-CoV-2 infection and presented with severe symptoms (between March 2020 – June 2020) and required hospitalization, all received remdesivir treatment for a clinical study. All participants were enrolled in August 2020 as healthy donors. “Age (Yr.)” column indicates age at enrolment.

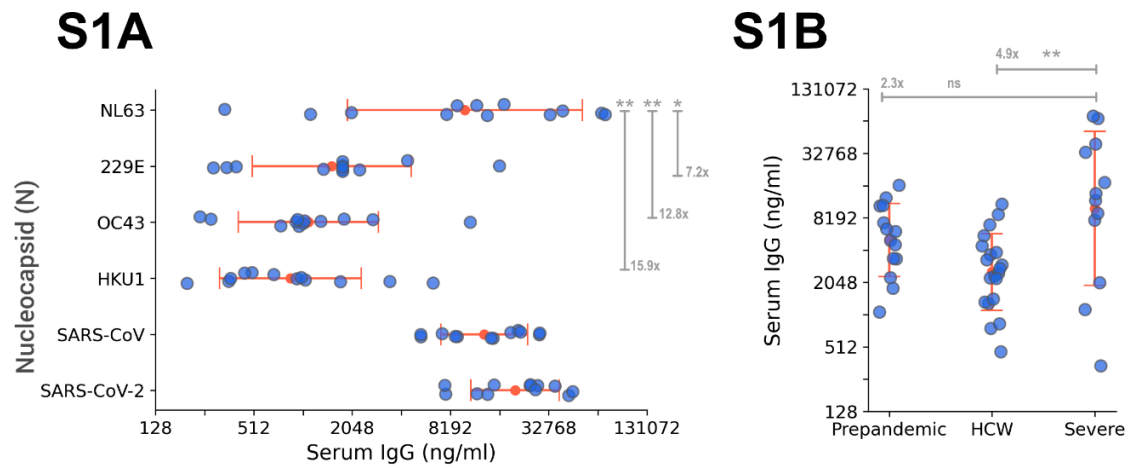

**Supplemental Figure S1** | Characterization of serum IgG response reactive to nucleocapsid (N) proteins by multiplex-based assay. **(S1A)** Comparison of serum IgG response reactive to six N proteins of individuals that were severely infected (n=12). **(S1B)** Comparison of the levels of N (NL63)-reactive serum IgG concentration between prepandemic, healthcare worker (HCW), and severely infected cohorts. Range shows geometric mean  $\times/\div$  geometric standard deviation. Significance (\*,  $P < 0.05$ ; \*\*,  $P < 0.01$ ; \*\*\*,  $P < 0.001$ ; \*\*\*\*,  $P < 0.0001$ ) was determined by Kruskal-Wallis ANOVA followed by Dunn's multiple comparisons test. The difference between levels is indicated as fold-change.

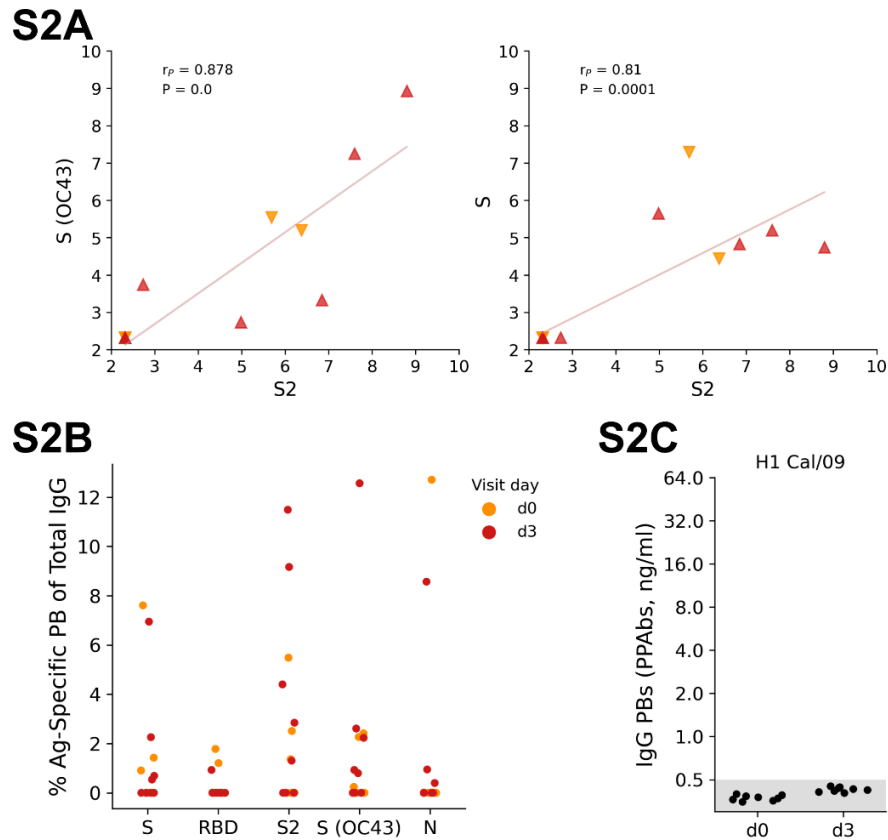

**Supplemental Figure S2 |** Coronavirus-specific IgG plasmablast (PB) response in acutely infected cohort. (**S3A**) Correlation analysis of the S2-reactive IgG PB against S (OC43) and full-length S. Correlation was tested by Pearson's  $r$  on the  $\log_2$ -transformed IgG PB frequency per million PBMCs. Orange and red triangles represent IgG PB frequency readout on visit days 0 and 3, respectively. (**S3B**) Fraction proportion of antigen-specific IgG PB from the total IgG-producing cells for both visit days 0 and 3. (**S3C**) Assessing the reactivity of IgG PB (by ELISA on the PB-derived polyclonal Abs [PPAbs]) reactive to H1 control protein.

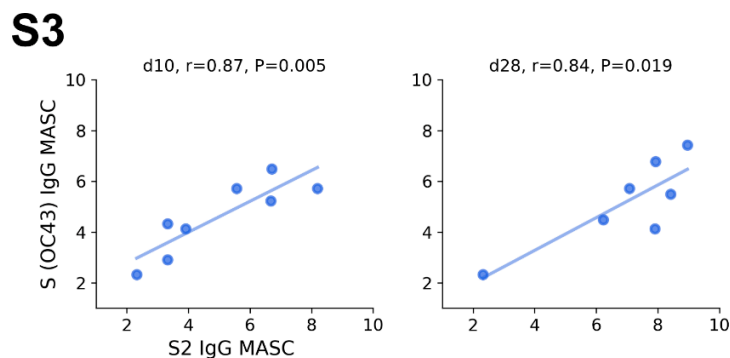

**Supplemental Figure S3 |** Correlation between the frequency of SARS-CoV-2 S2- and S (OC43)-reactive IgG MASCs as enumerated by ELISpot for samples collected on visit days 0, 10, 28, and 90. Values shown are  $\log_2$ -transformed of the IgG MASC per million PBMCs. Correlation was tested by Pearson  $r$ .

## S4A

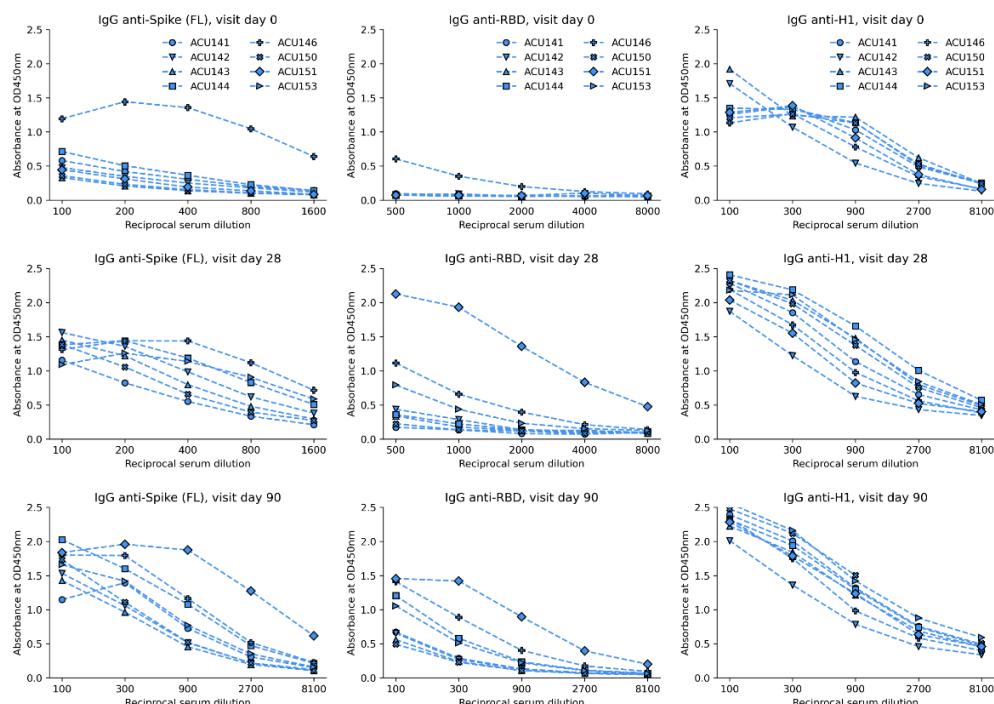

## S4B

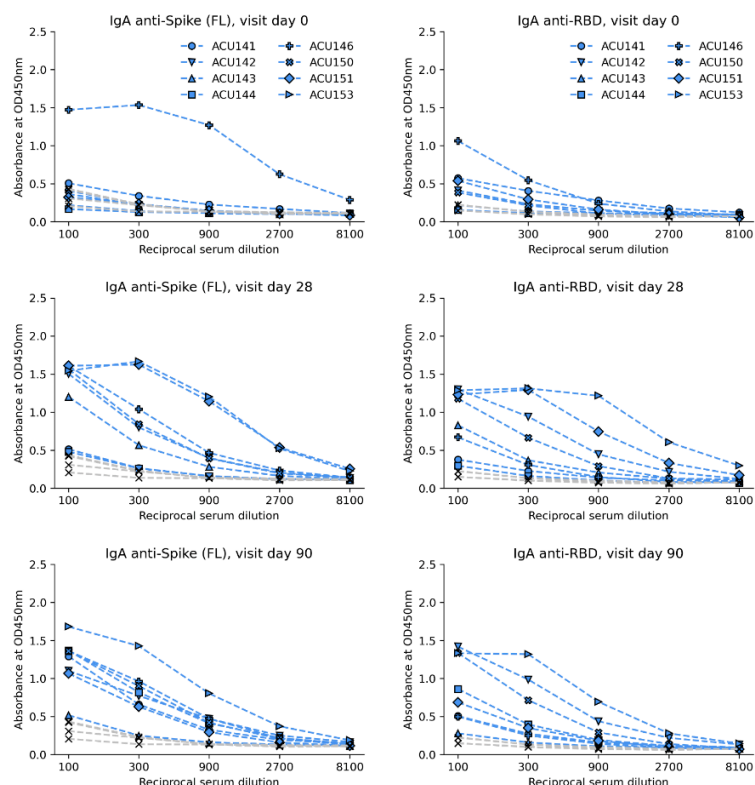

**Supplemental Figure S4 |** Validation of ELISA performance for protein constructs expressed in-house for (A) IgG and (B) IgA. 5-point serially-diluted sera (acutely infected cohort) were measured for reactivity against SARS-CoV-2 S (full-length), RBD, and H1 Cal/09. For IgA ELISA, COVID-negative controls (from healthcare worker cohort, indicated as gray lines) were included.
